# Supplementary material
Source: PubMed Central journal article supplement (PMC2707197)

**Online Data Supplement**

**PKA REGULATED ASSEMBLY OF A MEF2/HDAC4 REPRESSOR COMPLEX CONTROLS  
C-JUN EXPRESSION IN VASCULAR SMOOTH MUSCLE CELLS**

**Joseph W. Gordon<sup>1</sup>, Christina Pagiatakis<sup>1</sup>, Jahan Salma<sup>1</sup>, Min Du<sup>1</sup>, John J. Andreucci<sup>1</sup>, Jianzhong Zhao<sup>1</sup>,  
Guangpei Hou<sup>2</sup>, Robert L. Perry<sup>1</sup>, Qinghong Dan<sup>3</sup>, David Courtman<sup>3</sup>, Michelle Bendeck<sup>2</sup>, and John C.  
McDermott<sup>1</sup>**

From the Department of Biology<sup>1</sup>,

York University, Toronto, Ontario M5B 2P9

Department of Laboratory Medicine and Pathobiology,<sup>2</sup> and

Terrence Donnelly Cardiovascular Laboratories, St. Michael's Hospital<sup>3</sup>,

University of Toronto, Toronto, Ontario M5S 1A8

Running Head: MEF2/HDAC4 repress c-Jun in VSMC

Address correspondence to: J.C. McDermott, 4700 Keele Street, Toronto, Canada. M5B 2P9. Fax: 416-736-5698.

email: [jmcderm@yorku.ca](mailto:jmcderm@yorku.ca)

### Supplemental Figure Legends

**Figure S1. MEF2 activates of the myocardin reporter gene but not *c-jun* in VSMCs.** A) A10 cells were transfected with the *c-jun*, HRC, or myocardin enhancer reporter-genes and either empty pcDNA3 or MEF2C, or MEF2D. Cells were harvested for luciferase 24 hours after recovery. B) A10 cells transfected with the *c-jun* reporter gene were treated overnight with TGF- $\beta$ 1 (2 ng/mL) and harvested for luciferase assay.

**Figure S2. HDAC5 does not inhibit the *c-jun* promoter and HDAC4 does not inhibit the HRC promoter.**

A) A10 cells were transfected with the HRC reporter-gene and pMT2-MEF2A and/or Flag-HDAC4, or Flag-HDAC5, as indicated. Cells were harvested for luciferase 24 hours after recovery. B) A10 cells were transfected with the myocardin-enhancer reporter gene (MyE-luc), a myocardin-enhancer with the MEF2 binding site mutated (MyEmut-luc), the HRC promoter (HRC-luc), or the HRC promoter with a mutation in the MEF2 binding site (HRCmut-luc). Cells were harvested for luciferase assay.

**Figure S3. Effect of PKA on c-Jun expression and the MCP-1 promoter.** A) Quiescent A10 cells were pretreated with isoproterenol (1  $\mu$ M), milrinone (10  $\mu$ M), Rp-cAMPS (10  $\mu$ M), or H89 (10  $\mu$ M), as indicated, and stimulated with PDGF (20ng/mL) for 1 hour. Protein extracts were subjected to immunoblotting. B) A10 cells were transfected with the MCP-1 reporter-gene and pFC-PKA, as indicated. Cells were harvested for luciferase 24 hours after recovery. C) A10 cells were transfected with a MEF2 reporter gene (MEF2-luc), pMT2-MEF2A, or pFC-PKA, as indicated. Cells were harvested for luciferase assay.

Figure S1.

**A**

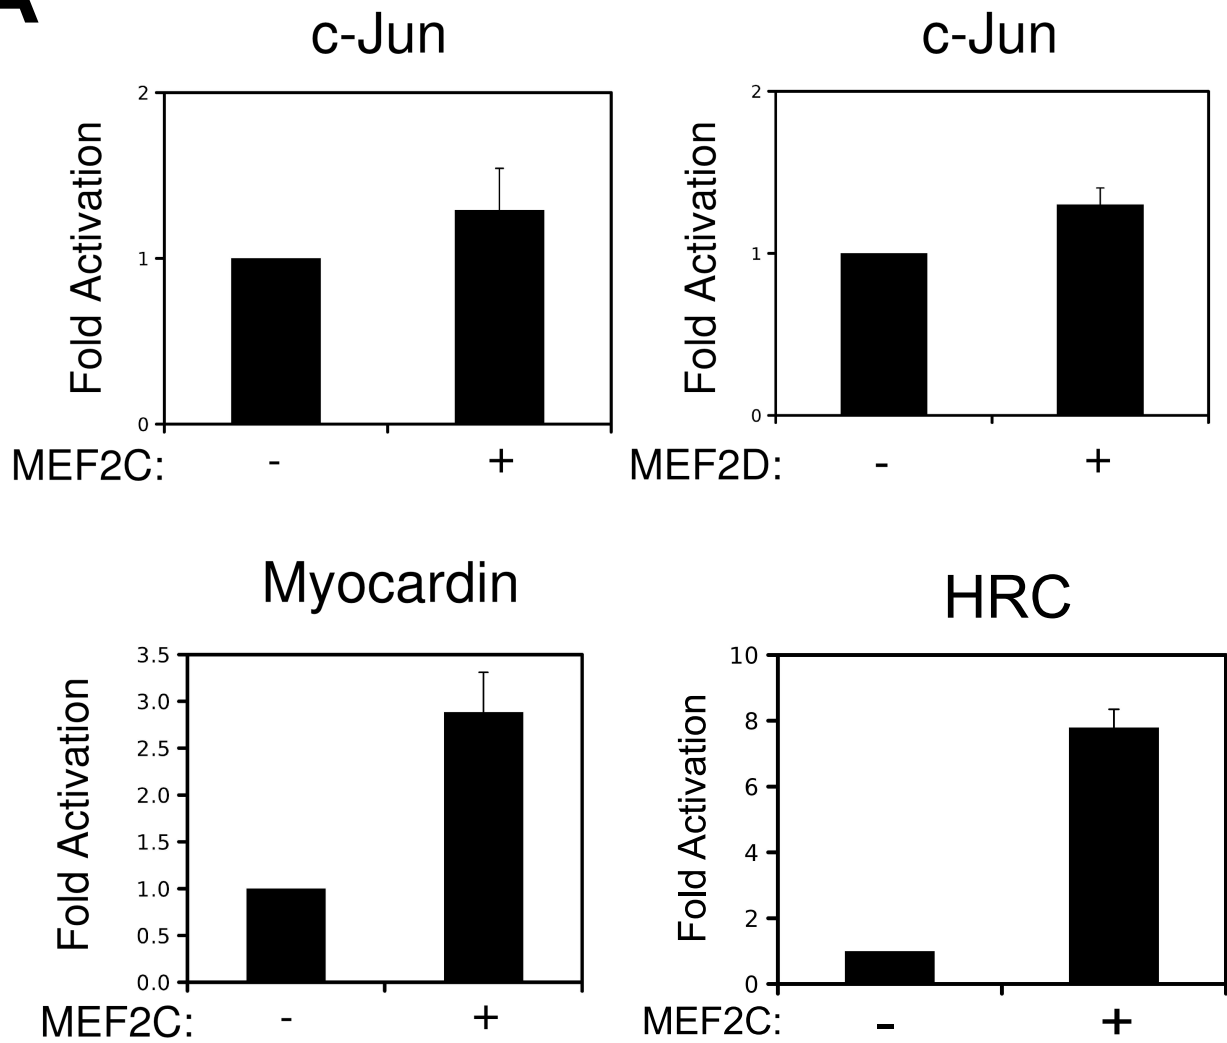

**B**

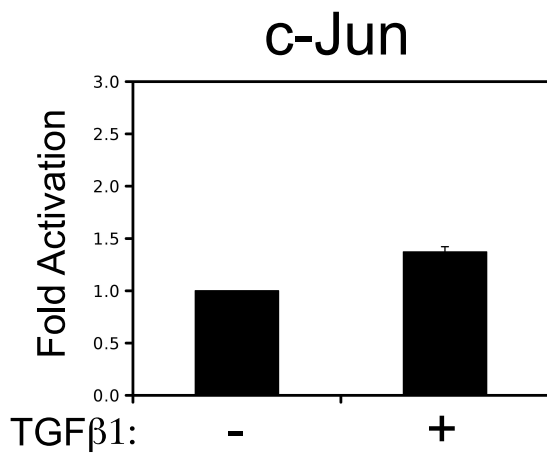

Figure S2.

**A**

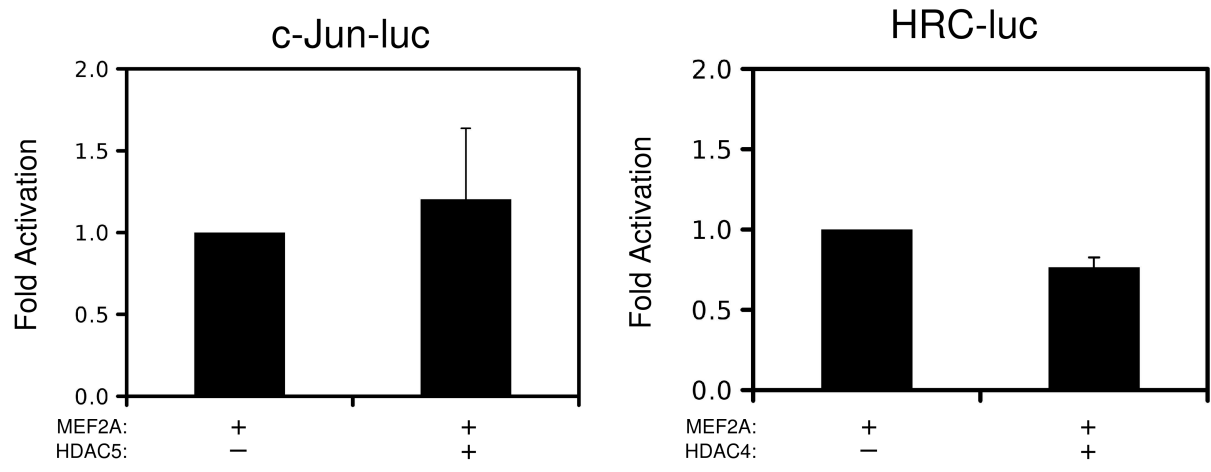

**B**

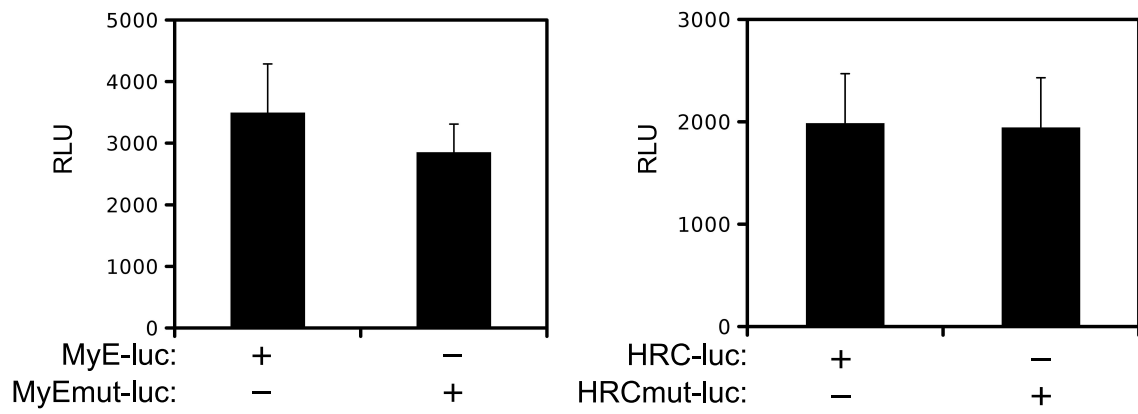

Figure S3.

**A**

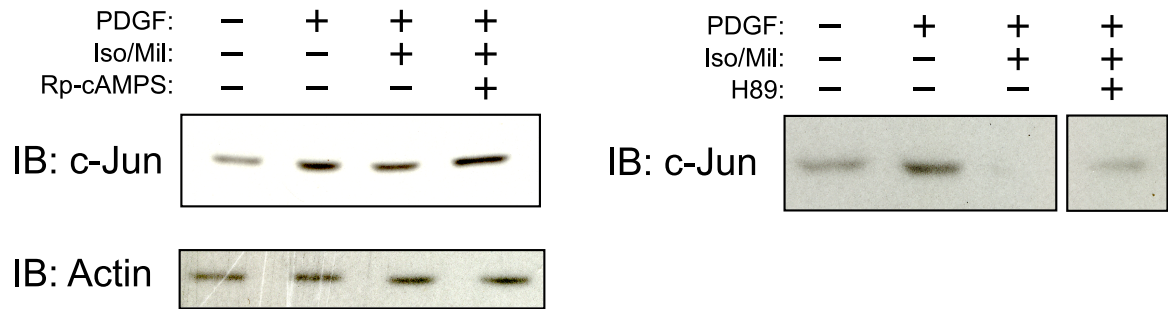

**B**

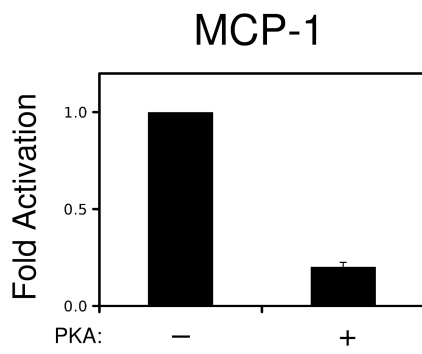

**C**

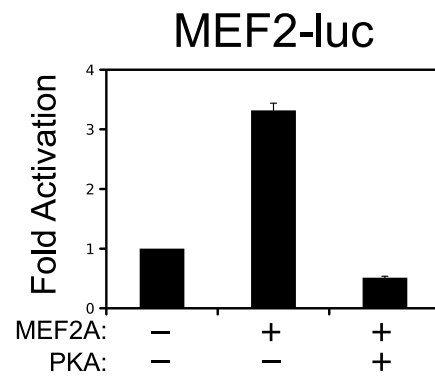

Supplement: supp_M109.000539_jbc.M109.000539-1.pdf [file supp_M109.000539_jbc.M109.000539-1.pdf]
